# Supplementary material for: Mixed-Forest Species Establishment in a Monodominant Forest in Central Africa: Implications for Tropical Forest Invasibility
Source: PLoS One. 2014 May 20;9(5):e97585. doi: 10.1371/journal.pone.0097585 (PMC4028239; doi:10.1371/journal.pone.0097585)
Supplement: Table S1 — List of tree species and their abundance. List of tree species and their total number of individuals (dbh>10 cm) found in three 1 ha plots within two forest types, monodominant Gilbertiodendron forest (mono) and mixed forest (mix). Species in bold had no individual with dbh≥10 cm in mixed forest plots. (DOCX) [file pone.0097585.s001.docx]

| | Family | Name | Forest types | | | --- | --- | --- | --- | |  |  | mono | mix | | Clusiaceae | *Allanblackia floribunda* Oliv. | 0 | 4 | | Apocynaceae | *Alstonia boonei* De Wild. | 1 | 7 | | Fabaceae | *Amphimas pterocarpoides* Harms | 0 | 4 | | Fabaceae | *Angylocalyx pynaerthii* De Wild. | 15 | 6 | | Annonaceae | *Anonidium mannii* (Oliv.) Engl. & Diels | 1 | 95 | | Rhizophoraceae | ***Anopyxis klaineana* (Pierre) Engl.** | 1 | 0 | | Fabaceae | *Anthonotha cladantha* (Harms) Léonard | 1 | 1 | | Fabaceae | *Anthonotha macrophylla* Pal. Beauv. | 0 | 9 | | Eurphorbiaceae | Antidesma sp. A | 0 | 1 | | Sapotaceae | ***Baillonella toxisperma* Pierre** | 2 | 0 | | Lauraceae | *Beilschmiedia* sp. A | 0 | 1 | | Lauraceae | *Beilschmiedia* sp. B | 0 | 1 | | Sapindaceae | *Blighia sapida* Konig | 3 | 12 | | Sapindaceae | *Blighia welwitschii* (Hiern) Radlk. | 1 | 4 | | Rubiaceae | *Brenania brieyi* (De Wild.) Petit | 0 | 2 | | Fabaceae | *Calpocalyx dinklagei* Harms | 0 | 1 | | Burseraceae | *Canarium schweinfurthii* Engl. | 0 | 1 | | Rubiaceae | Canthium sp. A | 0 | 1 | | Melicaceae | *Carapa procera* DC. | 14 | 66 | | Melicaceae | Carapa sp. A | 0 | 4 | | Bombaceae | *Ceiba pentandra* (L.) Gaertn. | 0 | 1 | | Ulmaceae | *Celtis tessmannii* De Wild. | 1 | 15 | | Ulmaceae | *Celtis zenkeri* Engl. | 1 | 23 | | Eurphorbiaceae | *Centroplacus glaucinus* Pierre | 3 | 24 | | Sapindaceae | *Chytranthus* sp. A | 0 | 1 | | Sapindaceae | *Chytranthus* sp. B | 0 | 1 | | Sapindaceae | *Chytranthus* sp. C | 0 | 1 | | Sapindaceae | *Chytranthus* sp. D | 0 | 1 | | Sapindaceae | *Chytranthus* sp. E | 0 | 1 | | Sapindaceae | *Chytranthus* sp. F | 0 | 1 | | Annonaceae | *Cleistopholis glauca* Pierre ex Engl. & Diels | 0 | 5 | | Annonaceae | *Cleistopholis patens* (Benth.) Engl. & Diels | 0 | 1 | | Myristicaceae | *Coelocaryon preussii* Warb. | 0 | 6 | | Rubiaceae | *Coffea* sp. A | 0 | 1 | | Sterculiaceae | *Cola acuminata* (P.Beauv.) Schott & Engl. | 2 | 6 | | Sterculiaceae | *Cola lateritia* K.Schum | 0 | 8 | | Fabaceae | *Cylicodiscus gabunensis* Harms | 0 | 2 | | Burseraceae | *Dacryodes edulis* (G.Don) H.J.Lam | 0 | 7 | | Burseraceae | *Dacryodes sp. A* | 0 | 1 | | Irvingiaceae | *Desbordesia glaucescens* (Engl.) Van Thiegh. | 13 | 13 | | Tiliaceae | *Desplatsia chrysochlamys* (Mildbr. & Burrey) Mildbr. | 0 | 4 | | Tiliaceae | *Desplatsia dewevrei* (De Wild. & Th.Dur.) Burrey | 0 | 11 | | Fabaceae | *Dialium guineense* Wild. | 3 | 5 | | Ebenaceae | *Diospyros crassiflora* Hiern | 1 | 4 | | Ebenaceae | *Diospyros hoyleana* F.White | 0 | 5 | | Eurphorbiaceae | *Discoglypremna caloneura* (Pax) Prain | 0 | 3 | | Fabaceae | *Distemonanthus benthamianus* Baill. | 0 | 31 | | Sapotaceae | *Donella pruniformis* (Pierre ex Engl.) Aubr. & Pellegr. | 0 | 2 | | Eurphorbiaceae | *Drypetes chevalieri* Beille | 1 | 3 | | Eurphorbiaceae | *Drypetes cf similis* | 0 | 2 | | Eurphorbiaceae | *Drypetes floribunda* (Müll.Arg.) Hutch. | 0 | 2 | | Eurphorbiaceae | ***Drypetes gossweileri* S.Moore** | 1 | 0 | | Eurphorbiaceae | *Drypetes ivorensis* Hutch. & Dalziel | 2 | 1 | | Eurphorbiaceae | *Drypetes laciniata* (Pax) Hutch. | 0 | 3 | | Eurphorbiaceae | *Drypetes* sp. A | 0 | 1 | | Eurphorbiaceae | *Drypetes* sp. B | 0 | 1 | | Eurphorbiaceae | *Drypetes* sp. C | 0 | 1 | | Eurphorbiaceae | *Drypetes* sp. D | 0 | 1 | | Eurphorbiaceae | *Drypetes* sp. E | 0 | 1 | | Eurphorbiaceae | *Drypetes* sp. F | 0 | 1 | | Tiliaceae | *Duboscia macrocarpa* Bocq. | 2 | 3 | | Annonaceae | *Enantia chlorantha* Oliv. | 1 | 24 | | Melicaceae | *Entandrophragma angolense* (Welw.) C.DC. | 0 | 1 | | Melicaceae | *Entandrophragma cylindricum* (Sprague) Sprague | 1 | 1 | | Sapindaceae | *Eriocoelum macrocarpum* Gilg ex Radlk. | 1 | 23 | | Sterculiaceae | *Eribroma oblongum* (Mast) Pierre ex Germian | 0 | 1 | | Vochysiaceae | *Erismadelphus exsul* Mildbr. | 0 | 1 | | Fabaceae | *Erythrophleum suaveolens* (Guil. & Perr.) Brenan | 1 | 4 | | Myrtaceae | *Eugenia* sp. A | 0 | 1 | | Myrtaceae | *Eugenia* sp. B | 0 | 1 | | Bigononiaceae | *Fernandoa adolfi-fredirici* Gilg. & Mildbr. | 1 | 1 | | Moraceae | *Ficus* sp. A | 0 | 1 | | Apocynaceae | *Funtumia africana* (Benth.) Stapf | 0 | 1 | | Apocynaceae | *Funtumia elastica* (Preuss) Stapf | 0 | 5 | | Sapotaceae | *Gambeya lacourtiana* (De Wild.) Aubr. | 3 | 10 | | Sapotaceae | *Gambeya perpulchra* (Mildbr. Ex Hutch & Dalziel) Aubrév & Pellegr. | 0 | 1 | | Sapotaceae | *Gambeya* sp. A | 0 | 1 | | Sapotaceae | *Gambeya* sp. B | 0 | 1 | | Clusiaceae | *Garcinia mannii* Oliv. | 0 | 10 | | Clusiaceae | *Garcinia punctata Stapf* | 0 | 1 | | Fabaceae | ***Gilbertiodendron dewevrei* (de Wild.) Léonard** | 805 | 0 | | Melicaceae | *Guarea cedrata* (A.Chev.) Pellegr. | 1 | 8 | | Melicaceae | *Guarea thompsonii* Sprague & Hutch. | 1 | 14 | | Olacaeae | *Heisteria trillesiana* Pierre | 1 | 18 | | Olacaeae | *Heisteria zimmereri* Engl. | 0 | 1 | | Annonaceae | *Hexalobus crispiflorus* A.Rich. | 0 | 3 | | Flacourtiaceae | *Homalium dolichophyllum* Gilg | 0 | 1 | | Flacourtiaceae | *Homalium letestui* Pellegr. | 0 | 1 | | Fabaceae | *Hylodendron gabunense* Taubert | 1 | 6 | | Eurphorbiaceae | *Hymenocardia lyrata* Tul. | 0 | 4 | | Eurphorbiaceae | *Hymenocardia* sp. A | 0 | 2 | | Irvingiaceae | *Irvingia gabonensis* (Aurey-Lecomte ex O'Rorke) Baill. | 2 | 5 | | Irvingiaceae | *Irvingia grandifolia* (Engl.) Engl. | 2 | 2 | | Irvingiaceae | *Irvingia robur* Mildbr. | 2 | 1 | | Fabaceae | *Isomacrolobium* sp. A | 0 | 3 | | Eurphorbiaceae | *Keayodendron bridelioides* (Hutch. & Dalz.) Léandri | 0 | 4 | | Eurphorbiaceae | *Klaineanthus gaboniae* Pierre ex Prain | 0 | 3 | | Eurphorbiaceae | *Klaineanthus* sp. A | 0 | 1 | | Irvingiaceae | *Klainedoxa gabonensis* Pierre | 3 | 7 | | Anacardiaceae | *Lannea welwitschii* (Hiern) Engl. | 0 | 1 | | Rhamnaceae | ***Lasiodiscus mannii* Hook.f.** | 1 | 0 | | Lepidobotryaceae | *Lepidobotrys staudtii* Engl. | 1 | 12 | | Chrysobalanaceae | *Licania elaeosperma* (Mildbr.) Prance & F.White | 0 | 1 | | Melicaceae | *Lovoa trichilioides* Harms | 1 | 3 | | Eurphorbiaceae | *Macaranga* sp. A | 0 | 3 | | Eurphorbiaceae | *Macaranga spinosa* Müll.Arg. | 0 | 4 | | Eurphorbiaceae | *Maesobotrya dusenii* (Pax) Hutch. | 0 | 6 | | Rhamnaceae | *Maesopsis eminii* Engl. | 0 | 2 | | Chrysobalanaceae | *Magnistipula* sp. A | 0 | 1 | | Clusiaceae | *Mammea africana* Sabine | 10 | 1 | | Sapotaceae | *Manilkara letouzeyi* Aubr. | 0 | 1 | | Eurphorbiaceae | ***Mareyopsis longifolia* (Pax) Pax & Hoffm.** | 3 | 0 | | Chrysobalanaceae | *Maranthes glabra* (Oliv.) Prance | 0 | 2 | | Chrysobalanaceae | *Maranthes* sp. A | 0 | 1 | | Eurphorbiaceae | *Margaritaria discoidea* (Baill.) Webster | 0 | 3 | | Melastomataceae | *Memecylon amshoffiae* Jacq.-Fél. | 0 | 1 | | Pandaceae | *Microdesmis puberula* Hook.f. ex Planch. | 0 | 2 | | Moraceae | *Milicia excelsa* (Welw.) Berg. | 0 | 1 | | Fabaceae | *Millettia laurentii* De Wild. | 0 | 1 | | Moraceae | *Musanga cecropioides* R.Br. | 0 | 1 | | Moraceae | *Myrianthus arboreus* P.Beauv. | 0 | 21 | | Rubiaceae | *Nauclea diderrichii* (De Wild.) Merril | 0 | 3 | | Simaroubaceae | *Odyendya gabonensis* (Pierre) Engl. | 5 | 2 | | Flacourtiaceae | *Oncoba glauca* (P.Beauv.) Planch. | 0 | 29 | | Olacaeae | *Ongokea gore* Pierre | 3 | 2 | | Annonaceae | *Pachypodanthium staudtii* (Engl. & Diels) | 0 | 3 | | Sapindaceae | *Pancovia pedicellaris* Radlk. & Gilg. | 0 | 1 | | Pandaceae | *Panda oleosa* Pierre | 1 | 15 | | Fabaceae | *Parkia bicolor* A.Chev. | 0 | 5 | | Rubiaceae | *Pauridiantha floribunda* (K.Schum. Ex K.Krause) Bremek. | 0 | 2 | | Rubiaceae | *Pausinystalia macroceras* (K.Schum.) Pierre | 0 | 1 | | Fabaceae | *Pentaclethra macrophylla* Benth. | 11 | 45 | | Lecythidaceae | *Petersianthus macrocarpus* (Beauv.) Liben | 1 | 60 | | Apocynaceae | *Picralima nitida* (Stapf) Th.Dur. | 0 | 3 | | Mimosaceae | *Piptadeniastrum africanum* (Hook.f.) Brenan | 0 | 6 | | Eurphorbiaceae | ***Plagiostyles africana* (Müll.Arg.) Prain** | 1 | 0 | | Annonaceae | *Polyalthia suaveolens* Engl. & Diels | 7 | 67 | | Anacardiaceae | *Pseudospondias microcarpa* (A.Rich.) Engl. | 0 | 4 | | Combretaceae | *Pteleopsis hylodendron* Mildbr. | 0 | 1 | | Fabaceae | *Pterocarpus mildbraedii* Harms | 0 | 4 | | Fabaceae | *Pterocarpus soyauxii* Taub. | 2 | 11 | | Myristicaceae | *Pycnanthus angolensis* (Welw.) Exell | 0 | 5 | | Apocynaceae | *Rauvolfia vomitoria* Afz. | 0 | 3 | | Ochnaceae | *Rhabdophyllum* sp. A | 0 | 1 | | Ochnaceae | *Rhabdophyllum* sp. B | 0 | 1 | | Ochnaceae | *Rhabdophyllum* sp. C | 0 | 2 | | Ochnaceae | *Rhabdophyllum* sp. D | 1 | 0 | | Violaceae | *Rinorea oblongifolia* (C.H.Wright) Marquand ex Chipp | 0 | 3 | | Violaceae | *Rinorea welwitschii* (Oliv.) Kuntze | 0 | 1 | | Violaceae | ***Rinorea* sp. A** | 1 | 0 | | Rubiaceae | *Rothmannia lujae* (De Wild.) Keay | 2 | 20 | | Burseraceae | *Santiria trimera* (Oliv.) Aubrév. | 7 | 30 | | Flacourtiaceae | *Scottellia* sp. A | 0 | 1 | | Anacardiaceae | *Sorindeia grandifolia* Engl. | 3 | 18 | | Anacardiaceae | *Sorindeia mildbraedii* Engl. & Brehmer | 2 | 12 | | Myristicaceae | *Staudtia stipitata* Warb. | 12 | 8 | | Sterculiaceae | *Sterculia tragacantha* Lindl. | 0 | 1 | | Olacaeae | *Strombosia grandifolia* Hook.f. | 5 | 5 | | Olacaeae | *Strombosia pustulata* Oliv. | 11 | 3 | | Olacaeae | *Strombosia zenkeri* Engl. | 0 | 1 | | Olacaeae | *Strombosiopsis tetrandra* Engl. | 3 | 8 | | Clusiaceae | *Symphonia globulifera* L.F. | 0 | 2 | | Sapotaceae | *Synsepalum dulcificum* (Schum.) Baill. | 1 | 11 | | Myrtaceae | *Syzygium rowlandii* (Engl.) Mildbr. | 0 | 4 | | Apocynaceae | *Tabernaemontana crassa* Benth. | 2 | 54 | | Fabaceae | *Tessmannia africana* Harms | 2 | 1 | | Fabaceae | ***Tessmannia anomala* (Micheli) Harms** | 4 | 0 | | Fabaceae | *Tetrapleura tetraptera* (Schum. & Thonn.) Taub. | 0 | 3 | | Moraceae | *Treculia africana* Desc. | 3 | 1 | | Rubiaceae | *Tricalysia discolor* Brenan | 0 | 2 | | Rubiaceae | *Tricalysia* sp. A | 0 | 1 | | Rubiaceae | *Tricalysia* sp. B | 0 | 1 | | Melicaceae | *Trichilia prieuriana* A.Juss. | 0 | 1 | | Melicaceae | *Trichilia rubescens* Oliv. | 0 | 12 | | Melicaceae | *Trichilia welwitschii* C.DC. | 1 | 3 | | Anacardiaceae | *Trichoscypha acuminata* Engl. | 11 | 22 | | Anacardiaceae | *Trichoscypha arborea* (A.Chev.) A.Chev. | 0 | 1 | | Sapotaceae | *Tridesmostemon omphalocarpoides* Engl. | 0 | 2 | | Moraceae | *Trilepisium madagascariense DC.* | 0 | 1 | | Eurphorbiaceae | *Uapaca acuminata* (Hutch.) Pax & Hoffm. | 1 | 20 | | Eurphorbiaceae | *Uapaca guineensis* Müll.Argr. | 0 | 23 | | Eurphorbiaceae | *Uapaca paluosa* Aubrév. & Léandri | 0 | 34 | | Eurphorbiaceae | *Uapaca vanhoutei De Wild.* | 0 | 2 | | Verbenaceae | *Vitex cienkowskii* Kotschy & Peyr. | 0 | 9 | | Verbenaceae | *Vitex grandifolia* Gürke | 0 | 1 | | Annonaceae | *Xylopia aethiopica* (Dun.) A.Rich. | 0 | 2 | | Annonaceae | *Xylopia hypolampra* Mildbr. | 1 | 3 | | Annonaceae | ***Xylopia parviflora* (A.Rich.) Benth.** | 1 | 0 | | Annonaceae | *Xylopia quintasii* Engl. & Diels | 1 | 14 | | Annonaceae | *Xylopia staudtii* Engl. & Diels | 0 | 1 | | Annonaceae | *Xylopia* sp. A | 0 | 1 | | Annonaceae | *Xylopia* sp. B | 0 | 1 | | Rutaceae | *Zanthoxylum gilletii* (De Wild.) Waterman | 0 | 2 | | Rutaceae | *Zanthoxylum heitzii* (Aubr. & Pellegr.) Waterman | 0 | 1 | |  | Unidentified sp. A | 0 | 1 | |  | Unidentified sp. B | 0 | 1 | |  | Unidentified sp. C | 0 | 1 | |  | Unidentified sp. D | 0 | 1 | |  | Unidentified sp. E | 0 | 1 | |  | Unidentified sp. F | 0 | 1 | |  | Unidentified sp. G | 0 | 1 | |  | Unidentified sp. H | 0 | 1 | |  | Unidentified sp. I | 0 | 1 | |  | Unidentified sp. J | 0 | 1 | |  | Unidentified sp. K | 0 | 1 | |  | Unidentified sp. L | 0 | 1 | |  | Unidentified sp. M | 0 | 1 | |  | Unidentified sp. N | 0 | 1 | |  | Unidentified sp. O | 0 | 1 | |  | Unidentified sp. P | 1 | 0 | |  | Unidentified sp. Q | 1 | 0 | |
| --- | --- | --- | --- | --- | --- | --- | --- | --- | --- | --- | --- | --- | --- | --- | --- | --- | --- | --- | --- | --- | --- | --- | --- | --- | --- | --- | --- | --- | --- | --- | --- | --- | --- | --- | --- | --- | --- | --- | --- | --- | --- | --- | --- | --- | --- | --- | --- | --- | --- | --- | --- | --- | --- | --- | --- | --- | --- | --- | --- | --- | --- | --- | --- | --- | --- | --- | --- | --- | --- | --- | --- | --- | --- | --- | --- | --- | --- | --- | --- | --- | --- | --- | --- | --- | --- | --- | --- | --- | --- | --- | --- | --- | --- | --- | --- | --- | --- | --- | --- | --- | --- | --- | --- | --- | --- | --- | --- | --- | --- | --- | --- | --- | --- | --- | --- | --- | --- | --- | --- | --- | --- | --- | --- | --- | --- | --- | --- | --- | --- | --- | --- | --- | --- | --- | --- | --- | --- | --- | --- | --- | --- | --- | --- | --- | --- | --- | --- | --- | --- | --- | --- | --- | --- | --- | --- | --- | --- | --- | --- | --- | --- | --- | --- | --- | --- | --- | --- | --- | --- | --- | --- | --- | --- | --- | --- | --- | --- | --- | --- | --- | --- | --- | --- | --- | --- | --- | --- | --- | --- | --- | --- | --- | --- | --- | --- | --- | --- | --- | --- | --- | --- | --- | --- | --- | --- | --- | --- | --- | --- | --- | --- | --- | --- | --- | --- | --- | --- | --- | --- | --- | --- | --- | --- | --- | --- | --- | --- | --- | --- | --- | --- | --- | --- | --- | --- | --- | --- | --- | --- | --- | --- | --- | --- | --- | --- | --- | --- | --- | --- | --- | --- | --- | --- | --- | --- | --- | --- | --- | --- | --- | --- | --- | --- | --- | --- | --- | --- | --- | --- | --- | --- | --- | --- | --- | --- | --- | --- | --- | --- | --- | --- | --- | --- | --- | --- | --- | --- | --- | --- | --- | --- | --- | --- | --- | --- | --- | --- | --- | --- | --- | --- | --- | --- | --- | --- | --- | --- | --- | --- | --- | --- | --- | --- | --- | --- | --- | --- | --- | --- | --- | --- | --- | --- | --- | --- | --- | --- | --- | --- | --- | --- | --- | --- | --- | --- | --- | --- | --- | --- | --- | --- | --- | --- | --- | --- | --- | --- | --- | --- | --- | --- | --- | --- | --- | --- | --- | --- | --- | --- | --- | --- | --- | --- | --- | --- | --- | --- | --- | --- | --- | --- | --- | --- | --- | --- | --- | --- | --- | --- | --- | --- | --- | --- | --- | --- | --- | --- | --- | --- | --- | --- | --- | --- | --- | --- | --- | --- | --- | --- | --- | --- | --- | --- | --- | --- | --- | --- | --- | --- | --- | --- | --- | --- | --- | --- | --- | --- | --- | --- | --- | --- | --- | --- | --- | --- | --- | --- | --- | --- | --- | --- | --- | --- | --- | --- | --- | --- | --- | --- | --- | --- | --- | --- | --- | --- | --- | --- | --- | --- | --- | --- | --- | --- | --- | --- | --- | --- | --- | --- | --- | --- | --- | --- | --- | --- | --- | --- | --- | --- | --- | --- | --- | --- | --- | --- | --- | --- | --- | --- | --- | --- | --- | --- | --- | --- | --- | --- | --- | --- | --- | --- | --- | --- | --- | --- | --- | --- | --- | --- | --- | --- | --- | --- | --- | --- | --- | --- | --- | --- | --- | --- | --- | --- | --- | --- | --- | --- | --- | --- | --- | --- | --- | --- | --- | --- | --- | --- | --- | --- | --- | --- | --- | --- | --- | --- | --- | --- | --- | --- | --- | --- | --- | --- | --- | --- | --- | --- | --- | --- | --- | --- | --- | --- | --- | --- | --- | --- | --- | --- | --- | --- | --- | --- | --- | --- | --- | --- | --- | --- | --- | --- | --- | --- | --- | --- | --- | --- | --- | --- | --- | --- | --- | --- | --- | --- | --- | --- | --- | --- | --- | --- | --- | --- | --- | --- | --- | --- | --- | --- | --- | --- | --- | --- | --- | --- | --- | --- | --- | --- | --- | --- | --- | --- | --- | --- | --- | --- | --- | --- | --- | --- | --- | --- | --- | --- | --- | --- | --- | --- | --- | --- | --- | --- | --- | --- | --- | --- | --- | --- | --- | --- | --- | --- | --- | --- | --- | --- | --- | --- | --- | --- | --- | --- | --- | --- | --- | --- | --- | --- | --- | --- | --- | --- | --- | --- | --- | --- | --- | --- | --- | --- | --- | --- | --- | --- | --- | --- | --- | --- | --- | --- | --- | --- | --- | --- | --- | --- | --- | --- | --- | --- | --- | --- | --- | --- | --- | --- | --- | --- | --- | --- | --- | --- | --- | --- | --- | --- | --- | --- | --- | --- | --- | --- | --- | --- | --- | --- | --- | --- | --- | --- | --- | --- | --- | --- | --- | --- | --- | --- | --- | --- | --- | --- | --- | --- | --- | --- | --- | --- | --- | --- | --- | --- | --- | --- | --- | --- | --- | --- | --- | --- | --- | --- | --- | --- | --- | --- | --- | --- | --- | --- | --- | --- | --- | --- | --- | --- | --- | --- | --- | --- | --- | --- | --- | --- | --- | --- | --- | --- | --- | --- | --- | --- | --- | --- | --- | --- | --- | --- | --- | --- | --- | --- | --- | --- | --- | --- | --- | --- | --- | --- | --- | --- | --- | --- | --- | --- | --- | --- | --- | --- | --- | --- | --- | --- | --- | --- | --- | --- | --- | --- | --- | --- | --- | --- | --- | --- | --- | --- | --- | --- | --- | --- | --- | --- | --- | --- | --- | --- | --- | --- | --- | --- | --- | --- | --- | --- | --- | --- | --- | --- | --- |
